# Supplementary material
Source: MDPI journal article supplement (https://www.mdpi.com/2073-445X/12/5/1039)
Supplement: s1 [file s1]

**Table S1.** abundance of butterfly communities in three different habitats.

|                                                  | DGS | OFP | PPF | IUCN EU<br>threatened status | myrmecophyllia | migratory |
|--------------------------------------------------|-----|-----|-----|------------------------------|----------------|-----------|
| <b>Hesperiidae</b>                               |     |     |     |                              |                |           |
| <i>Carcharodus alceae</i> (Esper)                | 3   | 1   | 1   | LC                           |                |           |
| <i>Carcharodus flocciferus</i> (Zeller)          | 1   |     |     | NT                           |                |           |
| <i>Muschampia proto</i> (Ochsenheimer)           | 6   | 1   |     | LC                           |                |           |
| <i>Ochlodes sylvanus</i> (Esper)                 | 1   | 2   |     | LC                           |                |           |
| <i>Pyrgus malvoides</i> (Elwes et Edwards)       | 1   |     | 3   | LC                           |                |           |
| <i>Spialia sertorius</i> (Hoffmansegg)           |     |     | 1   | LC                           |                |           |
| <i>Thymelicus sylvestris</i> (Poda)              | 1   | 4   | 6   | LC                           |                |           |
| <b>Lycaenidae</b>                                |     |     |     |                              |                |           |
| <i>Aricia agestis</i> (Denis et Schiffermüller)  | 11  |     | 5   | LC                           | X              |           |
| <i>Callophrys rubi</i> (L.)                      | 1   |     | 1   | LC                           |                |           |
| <i>Celastrina argiolus</i> (L.)                  | 1   |     | 4   | LC                           | X              |           |
| <i>Cupido minimus</i> (Fuessly)                  |     | 2   |     | LC                           | X              |           |
| <i>Lampides boeticus</i> (L.)                    | 1   |     |     | LC                           | X              | X         |
| <i>Leptotes pirithous</i> (L.)                   | 1   |     | 1   | LC                           | X              | X         |
| <i>Lycaena phlaeas</i> (L.)                      | 4   | 1   | 3   | LC                           |                |           |
| <i>Polyommatus bellargus</i> (Rottemburg)        | 2   |     | 2   | LC                           | X              |           |
| <i>Polyommatus coridon</i> (Poda)                | 2   |     |     | LC                           | X              |           |
| <i>Polyommatus icarus</i> (Rottemburg)           | 18  | 27  | 24  | LC                           | X              |           |
| <i>Polyommatus thersites</i> (Cantener)          | 3   | 1   | 2   | LC                           | X              |           |
| <i>Pseudophilotes baton</i> (Bergstrasser)       |     | 2   |     | LC                           | X              |           |
| <i>Satyrrium ilicis</i> (Esper)                  | 5   | 5   |     | LC                           | X              |           |
| <i>Satyrrium spini</i> (Denis et Schiffermüller) | 18  |     | 3   | LC                           |                |           |
| <b>Nymphalidae</b>                               |     |     |     |                              |                |           |
| <i>Brintesia circe</i> (F.)                      | 14  | 5   | 1   | LC                           |                |           |
| <i>Coenonympha pamphilus</i> (L.)                | 52  | 31  | 27  | LC                           |                |           |
| <i>Hipparchia semele</i> (L.)                    | 12  | 1   | 1   | LC                           |                |           |
| <i>Hipparchia statilinus</i> (Hufnagel)          | 47  | 27  | 12  | NT                           |                |           |
| <i>Issoria lathonia</i> (L.)                     | 1   |     | 2   | LC                           |                | X         |
| <i>Lasiommata megera</i> (L.)                    | 8   | 26  | 37  | LC                           |                |           |
| <i>Limenitis reducta</i> Staudinger              |     | 1   | 5   | LC                           |                |           |
| <i>Maniola jurtina</i> (L.)                      | 11  | 17  | 15  | LC                           |                |           |
| <i>Melanargia arge</i> (Sulzer)                  | 2   | 2   | 6   | LC                           |                |           |
| <i>Melanargia galathea</i> (L.)                  |     | 5   |     | LC                           |                |           |
| <i>Melanargia russiae</i> (Esper)                | 38  | 4   | 22  | LC                           |                |           |
| <i>Melitaea didyma</i> (Esper)                   | 12  | 6   | 2   | LC                           |                |           |
| <i>Melitaea trivia</i> (Denis et Schiffermüller) | 2   |     |     | LC                           |                |           |
| <i>Nymphalis polychloros</i> (L.)                |     | 1   | 1   | LC                           |                |           |
| <i>Pararge aegeria</i> (L.)                      |     | 3   | 4   | LC                           |                |           |
| <i>Pyronia cecilia</i> (Vallantin)               |     | 12  | 1   | LC                           |                |           |
| <i>Vanessa atalanta</i> (L.)                     | 4   | 5   | 6   | LC                           |                | X         |
| <i>Vanessa cardui</i> (L.)                       | 1   | 1   | 2   | LC                           |                | X         |
| <b>Papilionidae</b>                              |     |     |     |                              |                |           |
| <i>Iphiclides podalirius</i> (L.)                | 2   | 1   | 7   | LC                           |                |           |
| <i>Papilio machaon</i> L.                        | 27  | 8   | 34  | LC                           |                | X         |
| <b>Pieridae</b>                                  |     |     |     |                              |                |           |
| <i>Anthocharis cardamines</i> (L.)               | 5   | 10  | 7   | LC                           |                |           |
| <i>Aporia crataegi</i> (L.)                      | 13  |     | 1   | LC                           |                |           |
| <i>Colias alfacariensis</i> Ribbe                | 3   |     |     | LC                           |                | X         |
| <i>Colias crocea</i> (Fourcroy)                  | 6   | 1   | 9   | LC                           |                | X         |
| <i>Euchloe ausonia</i> (Hubner)                  |     |     | 1   | LC                           |                |           |
| <i>Gonepteryx cleopatra</i> (L.)                 |     |     | 1   | LC                           |                |           |
| <i>Gonepteryx rhamni</i> (L.)                    | 2   | 9   | 2   | LC                           |                |           |
| <i>Pieris brassicae</i> (L.)                     | 2   | 1   | 3   | LC                           |                |           |
| <i>Pieris mannii</i> (Mayer)                     |     |     | 1   | LC                           |                |           |
| <i>Pieris napi</i> (L.)                          | 1   | 1   | 4   | LC                           |                |           |
| <i>Pieris rapae</i> (L.)                         | 20  | 5   | 18  | LC                           |                |           |
| <i>Pontia edusa</i> (F.)                         | 20  |     | 7   | LC                           |                | X         |
